# Supplementary material for: Mesoporous carbon decorated graphene as an efficient electrode material for supercapacitors
Source: Royal Society of Chemistry journal article supplement (doi:10.1039/c3ta10890b), 2013-01-01
Supplement: c3ta10890b.pdf [file c3ta10890b.pdf]

**Supporting information**

*for*

**Mesoporous Carbon Decorated Graphene as Efficient Electrode Materials for Supercapacitor**

Meng Li, Jun Ding and Junmin Xue\*

Department of Materials Science and Engineering, National University of Singapore,  
Singapore, 117573

\* Corresponding author: Tel: +65 65164655

Email address: [msexuejm@nus.edu.sg](mailto:msexuejm@nus.edu.sg) (Dr J.M. Xue)

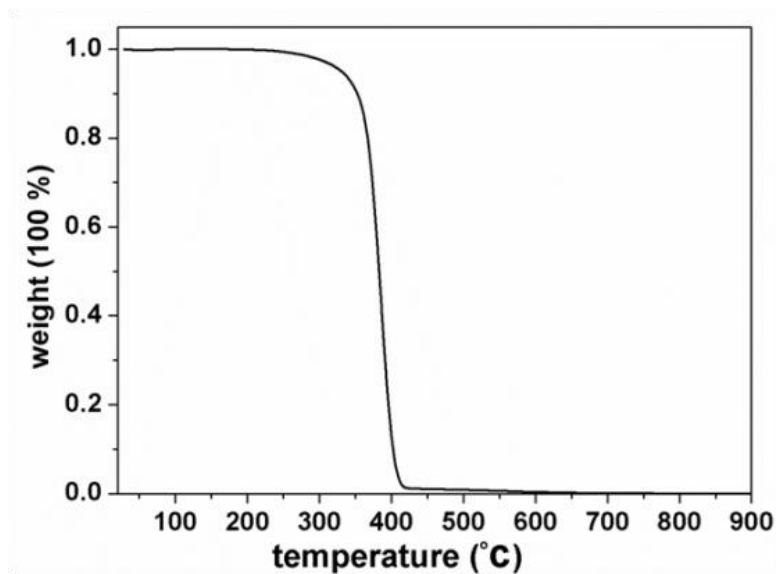

Figure S1: TGA pattern of pure F127

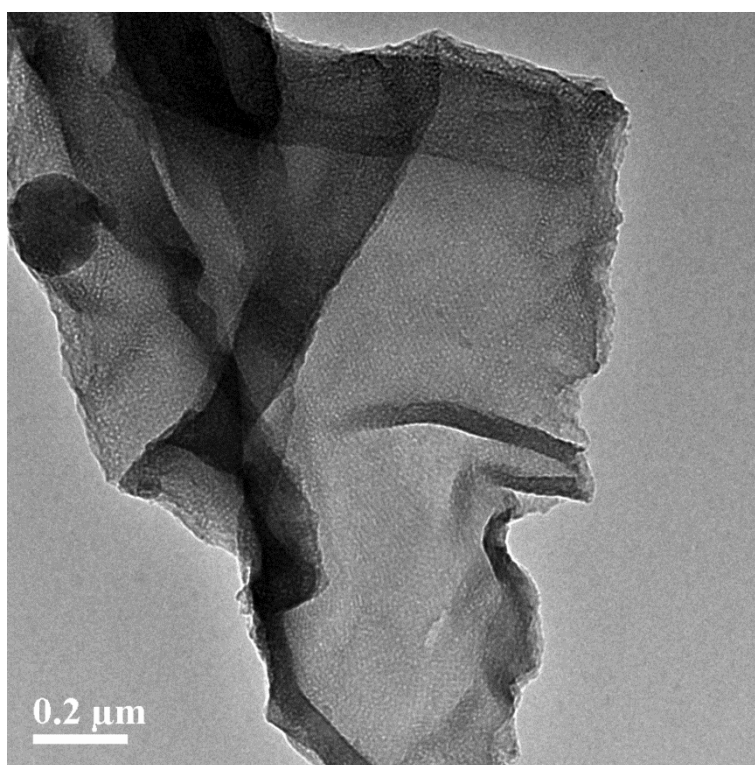

Figure S2: TEM image of MCG-5

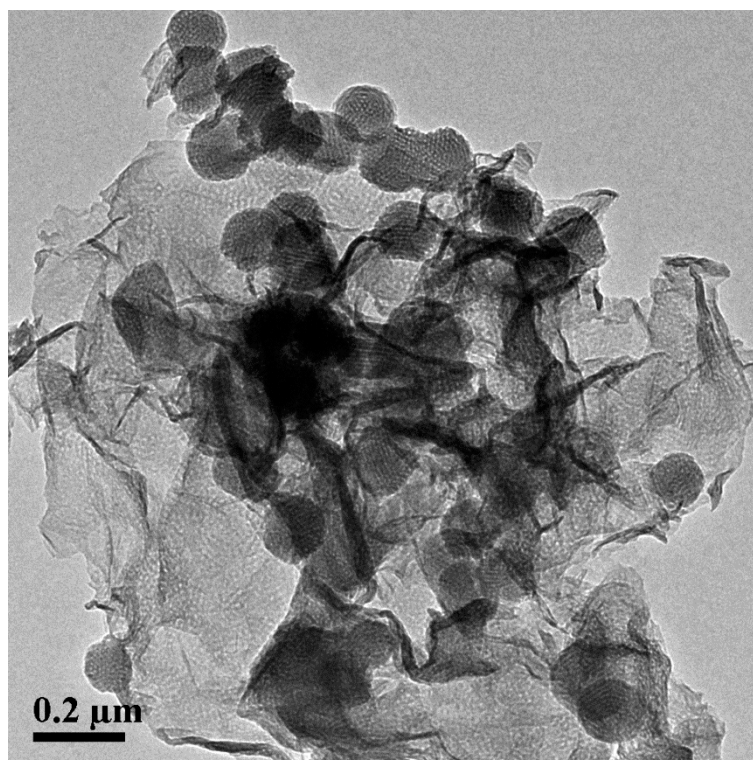

Figure S3: TEM image of MCG-20

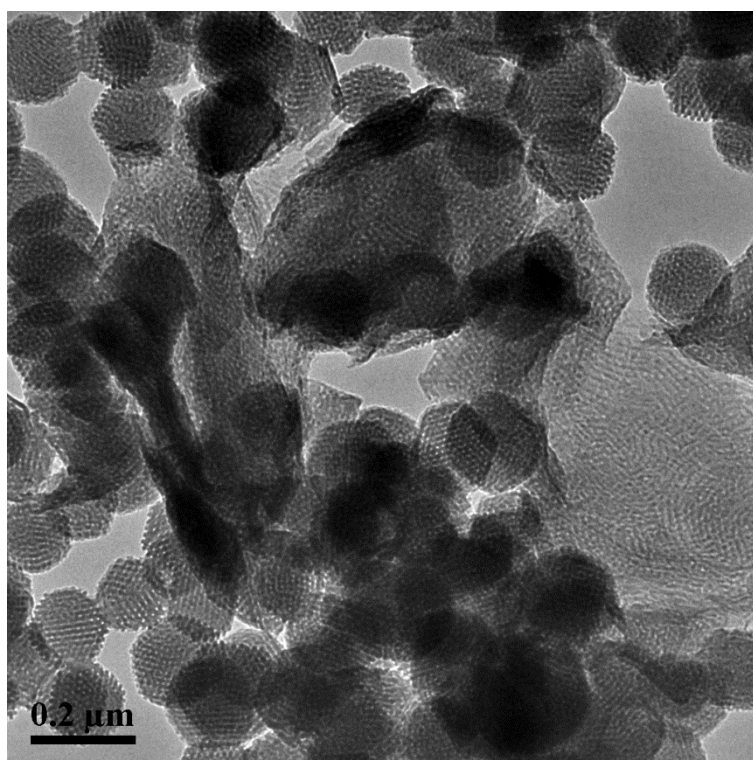

Figure S4: TEM image of MCG-40

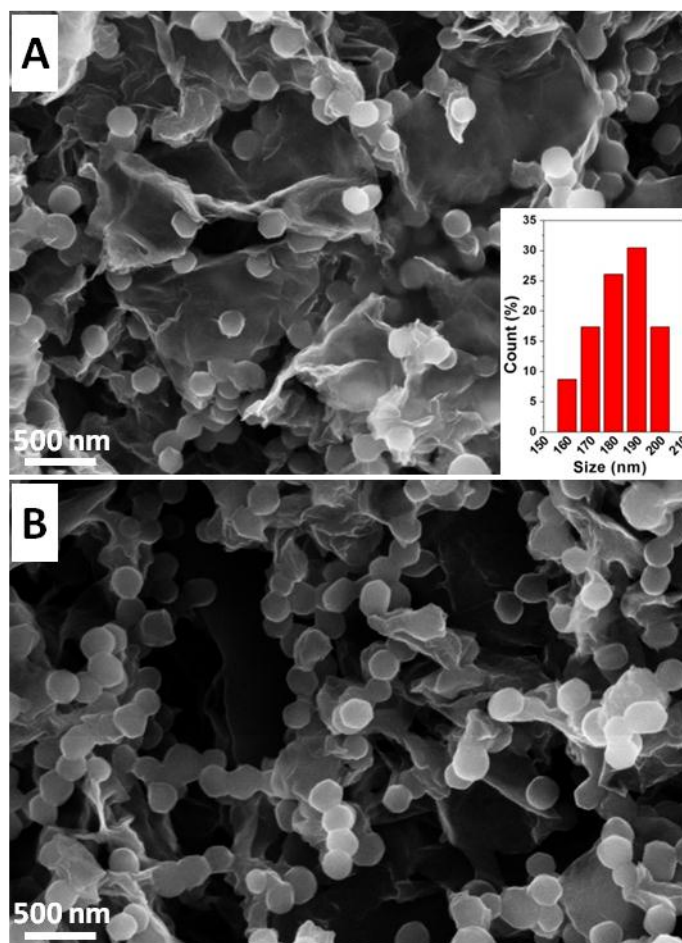

Figure S5: SEM images of A) MCG-20; B) MCG-40. The insert is size distribution of MCN in corresponding sample. The data was obtained by analyzing 100-200 spheres per sample from low magnification TEM images.

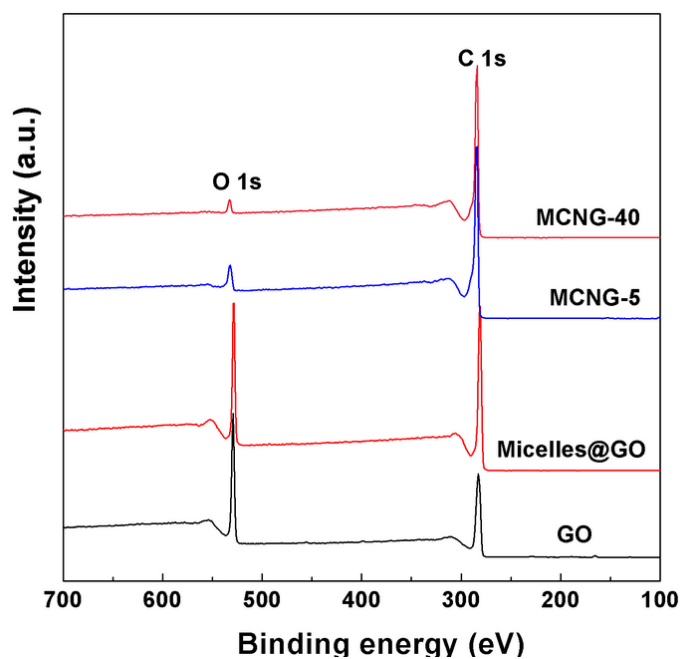

Figure S6: Survey XPS spectra of GO, micelles@GO, MCG-5 and MCG-40

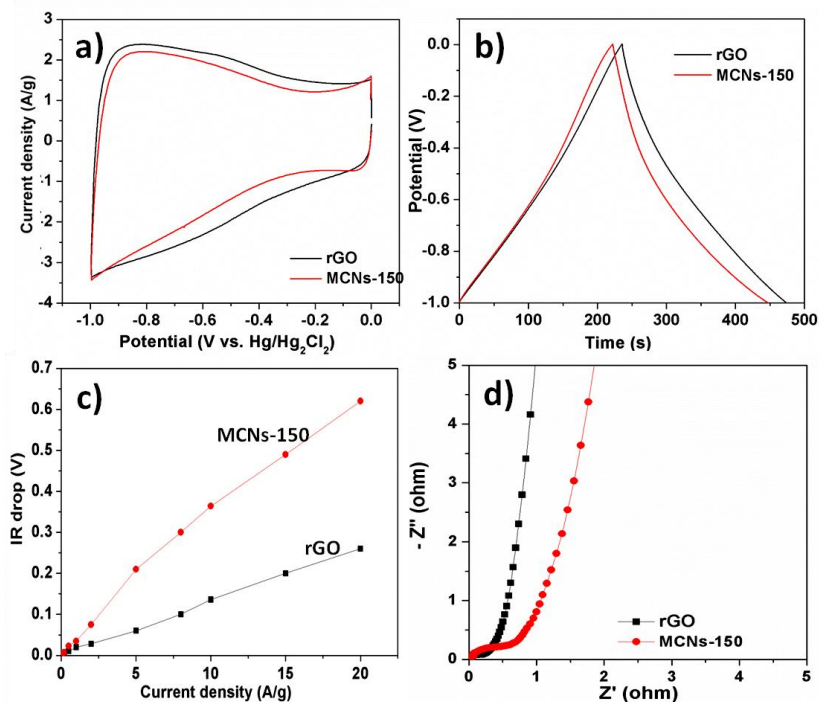

Figure S7: Electrochemical behavior of rGO and MCNs-150 (a) CV curves measured at the scan rate of 25 mV/s; (b) Galvanostatic charge-discharge curves at the current density of 0.5 A/g; (c) Variation of IR drop with discharge current density; (d) EIS under the influence of an ac voltage of 10 mV.

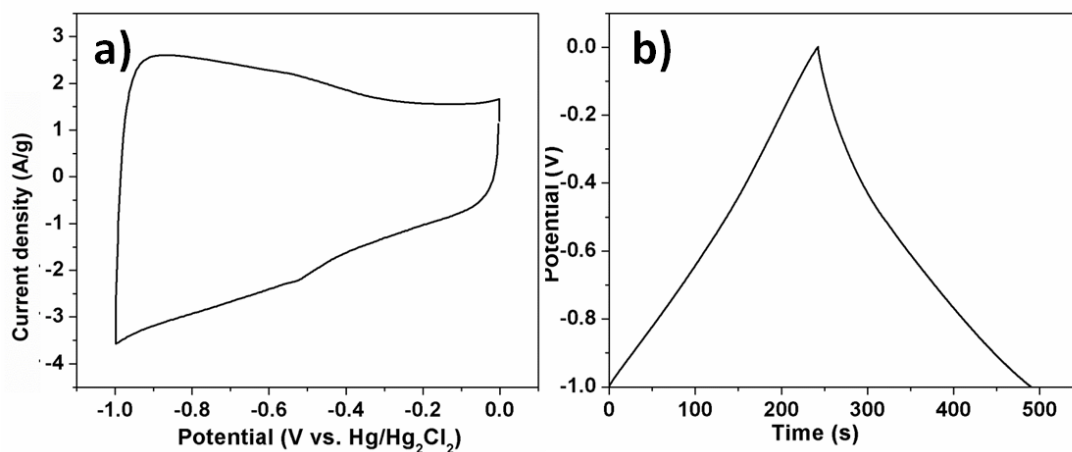

Figure S8: Electrochemical behavior of simple mixture of graphene and MCNs-150 (typical weight ratio of 1:1) (a) CV curves measured at the scan rate of 25 mV/s; (b) Galvanostatic charge-discharge curves at the current density of 0.5 A/g



**Table S1. Typical EDLC capacitance of carbonaceous materials based on the aqueous electrolyte.**

| Materials                 | Electrode system | Current density  | Specific capacitance       | Ref.         |
|---------------------------|------------------|------------------|----------------------------|--------------|
| MCG                       | Three            | 0.5A/g           | 213~113 F/g                | Present work |
| Mesoporous carbon         | Three            | 0.5A/g           | 132~113 F/g                | [s1]         |
| MCN                       | Three            | 0.5A/g           | 142~98 F/g                 | [16]         |
| MCS                       | Two              | 0.25A/g          | 225 F/g                    | [s2]         |
| 3D Macroporous Graphene   | Three            | 1A/g             | 202 F/g                    | [s3]         |
| GNS                       | Three            | 0.1A/g           | 150 F/g                    | [s4]         |
| Activated Graphene        | Two              | 50mV/s           | 14 $\mu$ F/cm <sup>2</sup> | [9]          |
| B and N co-doped Graphene | Two<br>Three     | 5 mV/s<br>1 mV/s | 62 F/g<br>239 F/g          | [s5]         |
| N doped CNF               | Three            | 1A/g             | 202 F/g                    | [s6]         |
| GMCS                      | Two              | 0.1A/g           | 39.4 F/g                   | [21]         |
| Graphene Foam             | Two              | 0.5A/g           | 110                        | [s7]         |
| Graphene/CNT              | Three            | 1 mV/s<br>0.6A/g | 175 F/g<br>230 F/g         | [s8]         |

## References

- [s1] J. X. Wang, C. F. Xue, Y. Y. Lu, F. Zhang, B. Tu, D. Y. Zhao, *Carbon*, 2011, **49**, 4580–4588.
- [s2] Z. Lei, N. Christov, L. L. Zhang and X. S. Zhao, *J. Mater. Chem.*, 2011, **21**, 2274-2281.
- [s3] B. G. Choi, M. H. Yang, W. H. Hong, J. W. Choi and Y. S. Huh, *ACS Nano* 2012, **6**, 4020-4028.
- [s4] X. Du, P. Guo, H. Song and X. Chen, *Electrochim Acta*, 2010, **55**, 4812-4819.
- [s5] Z. S. Wu, A. Winter, L. Chen, Y. Sun, A. Turchanin, X. F. Feng and K. Mullen, *Adv. Mater.* 2012, **24**, 5130-5135.
- [s6] L. F. Chen, X. D. Zhang, H. W. Liang, M. G. Kong, Q. F. Guan, P. Chen, Z. Yu. Wu and S. H. Yu, *ACS Nano*, 2012, **6**, 7092-7102.
- [s7] Z. Q. Niu, J. Chen, H. H. Hng, J. Ma and X. D. Chen, *Adv. Mater.* 2012, **24**, 4144-4150.
- [s8] D. Zhang, T. Yan, L. Shi, Z. Peng, X. Wen and J. Zhang, *J. Mater. Chem.*, 2012, **22**, 14696-14704.
